1 **Cytomixis and aberrant phenomena during meiosis in**  
2 **pollen mother cells of *Camellia sinensis* var. *sinensis***  
3 **cv ‘Fudingdabai’**

4 Xuelian Yu<sup>1</sup>, Xinhan You<sup>1</sup>, Lixia Zhang<sup>1\*</sup>, Xingfeng Li<sup>2\*</sup>

5 <sup>1</sup>College of Horticulture Science and Engineering, Shandong Agricultural University, Tai’an, 271018, China

6 <sup>2</sup>College of Agronomy, Shandong Agricultural University, Tai’an, 271018, China

7

8

9

10 **Abstract:** Tea plant (*Camellia sinensis*) is an economically essential crop in China, Japan and  
11 other countries. The present study reports the meiotic behavior, including microsporogenesis  
12 of the 'Fudingdabai' cultivar in *Camellia sinensis* var. *sinensis*. Most of the investigated  
13 pollen mother cells undergo normal meiosis processes. In contrast, a few of the pollen mother  
14 cells showed some abnormal phenomena such as cytomixis, monovalent, laggard  
15 chromosomes, unsynchronized division, micronucleus, and so on. Among which, spontaneous  
16 cytomixis is the most common phenomenon, which mainly occurred in early prophase I but  
17 also in meiosis II. Other abnormal phenomena were less than cytomixis. The results of this  
18 study laid a foundation for exploring the meiosis and cytogenetics study of the tea plants.

19

20 **Keywords:** *Camellia sinensis*, Cytomixis, Meiosis, Microsporogenesis

21

22

## Introduction

23 Tea tree [*Camellia sinensis* (L.) O. Kuntze] ( $2n = 2x = 30$ ) is a member of the angiosperm  
24 *Camellia* genus of the *Theaceae*, whose leaves can be used to produce different varieties of tea  
25 according to different processing processes. As a cash crop originating in the southwest of  
26 China, tea trees have played an essential role in the development of the regional economy<sup>[1,2]</sup>  
27 *Camellia sinensis* var. *sinensis* cv. 'Fudingdabai' (FD) (accession No. GS13001-1985;  
28 Agricultural Plant Variety Name Retrieval System, Ministry of Agriculture and Rural Affairs,  
29 China), originally planted in southern China, is one of the earliest clonal tea plant cultivars  
30 recognized at the national level in China and is also the largest tea plant cultivar in China and  
31 worldwide<sup>[3,4]</sup>. The variety was introduced to Shandong Province in the 1980s, with strong  
32 resistance to adversity, stable quality and a wide range of adaptability, and is often used as a  
33 control variable in comparison with other varieties, so it is more meaningful to study the  
34 chromosomal behavior of pollen mother cells of 'Fudingdabai'.

35 Meiosis is important in maintaining genetic stability and enriching plant variability, the  
36 abnormal phenomena during meiosis have attracted more and more attention at home and  
37 abroad. The development of cytological studies in *Theaceae* is backward, mostly focusing on  
38 analyzing chromosome ploidy and karyotype. Research on meiosis has also been carried out in  
39 several *Camellia* plants<sup>[5]</sup>, multiple chromosomal abnormal behaviors were found during  
40 meiosis in PMCs, such as *Camellia crassicolumna* and *Camellia oleifera* <sup>[6-8]</sup>. However, for  
41 *Camellia sinensis* var. *sinensis*, the chromosome behavior during meiosis requires to be  
42 elucidated.

43 In this study, the flower buds of 'Fudingdabai' cultivar planted in Shandong Province were

44 collected, and the microsporogenesis and pollen development process of pollen mother cells  
45 were systematically observed by pressing tablets. The purpose of this study was to provide  
46 cytological data for the pollen fertility of tea trees and to provide a reference for further studies  
47 on tea tree cytogenetics.

## 48 **Materials and methods**

### 49 **Sampling and preservation**

50 The materials are the unopened buds of ‘Fudingdabai’ planted in the “Chaxigu Planting  
51 Base” in Tai’an City, Shandong Province (116.94 E, 36.22 N). The buds measuring between  
52 4.2 and 5.0 mm were sampled randomly from different shoots. The Buds larger than 5 mm in  
53 diameter were not used as they had passed the division stage, and 4.2 to 5.0 mm in diameter  
54 were the best source of anthers for studying meiosis.

55 At 8:00–10:00 am, flower buds were fixed in freshly prepared Carnoy’s fixative (Ethanol:  
56 Acetic Acid = 3:1) for 24 h, after which they were washed and stored in 70% alcohol at 4 °C.

### 57 **Slide preparation**

58 Both fixed and freshly collected anthers were squashed and stained with Carbol fuchsin  
59 before microscope study. Photographs of freshly prepared slides were taken with the automatic  
60 camera of Nikon Eclipse Ni-U microscope.

## 61 **Results**

### 62 **Meiosis of PMCs and Microsporogenesis**

63 Meiotic study proved that moost of the investigated pollen mother cells in ‘Fudingdabai’

64 undergo normal meiosis processes (Table 1). The chromosome number of ‘Fudingdabai’ was  
65  $2n = 30$ . Almost all the examined cells had the expected 15 bivalents ((Fig. 1f).

66 At the beginning of meiosis, PMCs with dense cytoplasm huddled together in the anther  
67 and were challenging to separate. In the early leptotene stage (Fig. 1a), filiform chromosomes  
68 were irregularly distributed around the nucleolus, where the cytoplasm was still thick.  
69 Chromosomes gradually gathered at one side of the nucleolus during the late leptotene stage  
70 (Fig. 1b), which presented as a truss. Homologous chromosomes pairing together, and partial  
71 juxtaposition of the chromosomes in the cytoplasm can be observed around the nucleolus (Fig.  
72 1c). The chromosomes continued to coarsen during the pachytene stage (Fig. 1d), and  
73 chromosomes remained entangled. During the diplotene stage (Fig. 1e), homologous  
74 chromosomes began to repel each other, although chromosome chiasmata were observed.  
75 Chromosomes were highly coagulated, and 15 bivalents separated equally in the cell,  
76 facilitating chromosome counting during the diakinesis stages (Fig. 1f). At metaphase I (Fig.  
77 1g), chromosomes were neatly established along the equatorial plate. Subsequently, during  
78 anaphase I (Fig. 1h), chromosomes of homologous pairs were pulled to different poles of the  
79 cell(Fig. 1i). During the second division, the chromosomes became diffuse at prophase II (Fig.  
80 1j), arranged themselves properly on the equatorial plane at metaphase II (Fig. 1k), and  
81 chromatids moved to the opposite poles during anaphase II (Fig. 1l) and nuclei reformed at  
82 telophase II (Fig. 1m). Finally, the tetrads were formed. Cytokinesis was simultaneous, and  
83 the microspore tetrads were tetrahedral (Fig. 1n, o).

84 After meiosis, the microspores are released and developed with dense cytoplasm. The  
85 nucleus was located in the center of the cell with a large volume in mononuclear microspore

86 stage (Fig. 1p). With the development of mononuclear microspores, vacuoles appear in the  
87 cell and push the nucleus towards the cell wall. This stage is the sidelining stage of mononuclear  
88 microspores (Fig. 1q). Then, the microspores begin to undergo mitosis and form pollen grains  
89 as the microspores mature (Fig. 1r, s). Multiple developmental stages of  
90 microsporogenesis were observed in one bud (Fig. 1t).

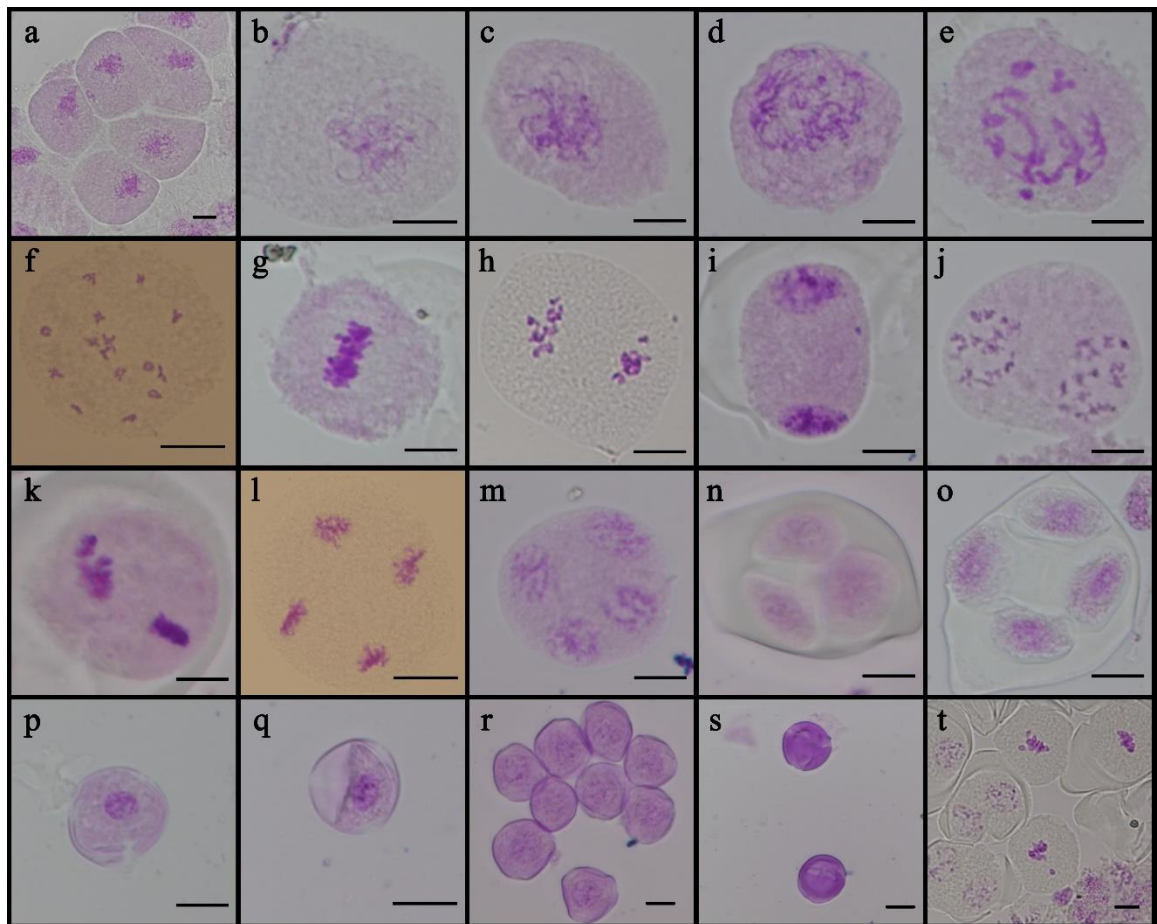

91

92 Fig. 1 The microsporogenesis of PMCs in *C. sinensis*

93 (a) Early leptotene, (b) Leptotene, (c) Zygotene, (d) Pachytene, (e) Diplotene, (f) Diakinesis, (g) Metaphase I, (h)  
94 Anaphase I, (i) Telophase I, (j) Prophase II. (k) Metaphase II. (l) Anaphase II, (m) Telophase II, (n)  
95 Tetrahedral tetrad, (o) Planar tetrad, (p) Monokaryon, (q) Late uninucleate stage, (r) Immature pollen, (s) The mature  
96 pollen, (t) Multiple meiotic phases were observed in one flower bud. Bar=10 $\mu$ m

97

98 **Cytomixis in ‘Fudingdabai’**

99        Among all the abnormal phenomena in microsporogenesis, spontaneous cytomixis appeared  
100        with the higher frequently in ‘Fudingdabai’. Cytomixis involving the transfer of chromatin  
101        material via the cytoplasmic channels among adjacent PMCs at various stages of meiosis was  
102        observed in *C. sinensis* (Fig. 2), which mainly occurred at prophase I (10.1%), followed by  
103        M II (9.27%).

104        At the leptotene stage of prophase I, the chromatin were condensed and visible as a  
105        chromatin balls that lay close to the cell membrane with clustered cytotoxic channels (CCs)  
106        (Fig. 2a-d). Chromatin migration caused the formation of single or multiple chromatin bridges  
107        between PMCs (Fig. 2e). The chromatin might transferred either in one direction or randomly.  
108        One cells usually transferred chromatin to one of the neighboring cells, but sometimes also to  
109        two or more cells, or even from two or more nuclei into one cell. Chromatin migration not only  
110        happen between cells that were in the same stage, but also cells in different stages of meiosis  
111        (Fig. 1f). In some instances, the recipient cell passed the chromatin on to another cell sometimes,  
112        it appeared as though chromatin passed from the first meiocyte to the second, from the second  
113        to the third, and so on (Fig. 2g-j). The amount of chromatin being transferred ranged from one  
114        chromosome to some chromosomes, but it rarely happened that the whole nucleus would  
115        migrate (Fig. 2k), leaving the meiocyte de-nucleated and resulting in hypo- and hyperploid  
116        PMCs (Fig. 2l).



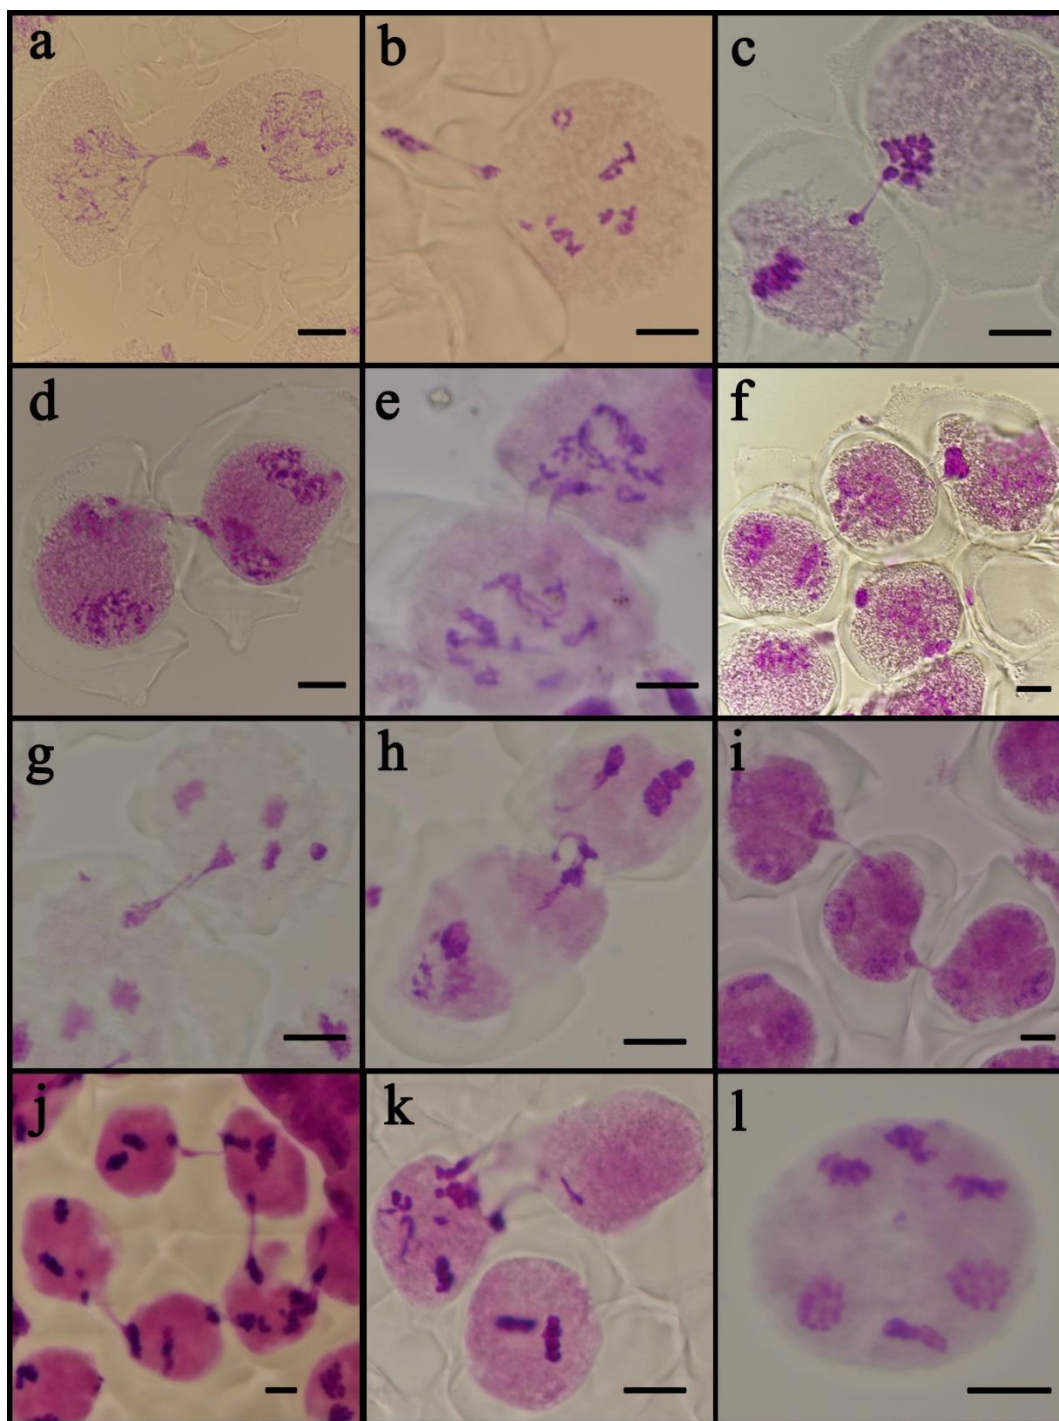

117

118 Fig. 2 Cytomixis in 'Fudingdabai'

119 (a-d) Cytomixis in PMCs at a different stage, (e) Cytomixis in PMCs through more than one cytomictic channels ,

120 (f) Chromosome migration in PMCs between different stages, (g-j) the recipient cell passes the chromatin on to

121 another cell sometimes, (k) the whole nucleus migrates, (l) hyperploid PMCs. Bar=10 $\mu$ m

122

123 **Other abnormal chromosome behaviors**



124        Apart from cytomixis, other aberrant chromosome behaviors were also observed. These  
125 induced the presence of laggard chromosomes, chromosome bridges, univalent, unequal  
126 clusters of chromosomes and fragments in microsporogenesis (Table 1).

127        Several chromosomes were not synchronized (neatly arranged on the cell plate) in  
128 metaphase I (Fig. 3a). During the observation of anaphase I in ‘Fudingdabai’ PMCs, it  
129 was observed that some cells had lagging chromosomes (Fig. 3b), which showed that when  
130 chromosomes were pulled to both poles by spindle filaments, a few chromosomes did not move  
131 to both poles or moved more slowly. Similarly, chromosome separation was not synchronized  
132 in anaphase II (Fig. 3c), and lagging chromosomes were observed (Fig. 3d). These lagging  
133 chromosomes or fragments would formed the micronuclei laterly. The presence of micronuclei  
134 was found at prophase I (Fig. 3e) and prophase II (Fig. 3f). Univalent were also observed  
135 in some cells at diakinesis (Fig. 3g). Sometimes the chromosomes in different dyad would  
136 undergone different stages of division (Fig. 3h-j). Another well-known phenomenon was  
137 abnormal karyokinesis and cytokinesis in PMCs (Fig. 3k-n), resulting in unequal distribution  
138 of chromosomes/chromatin in daughter cells. All these abnormalities can lead to an increased  
139 (Fig. 3o) or decrease (Fig. 3p) of chromosomes.

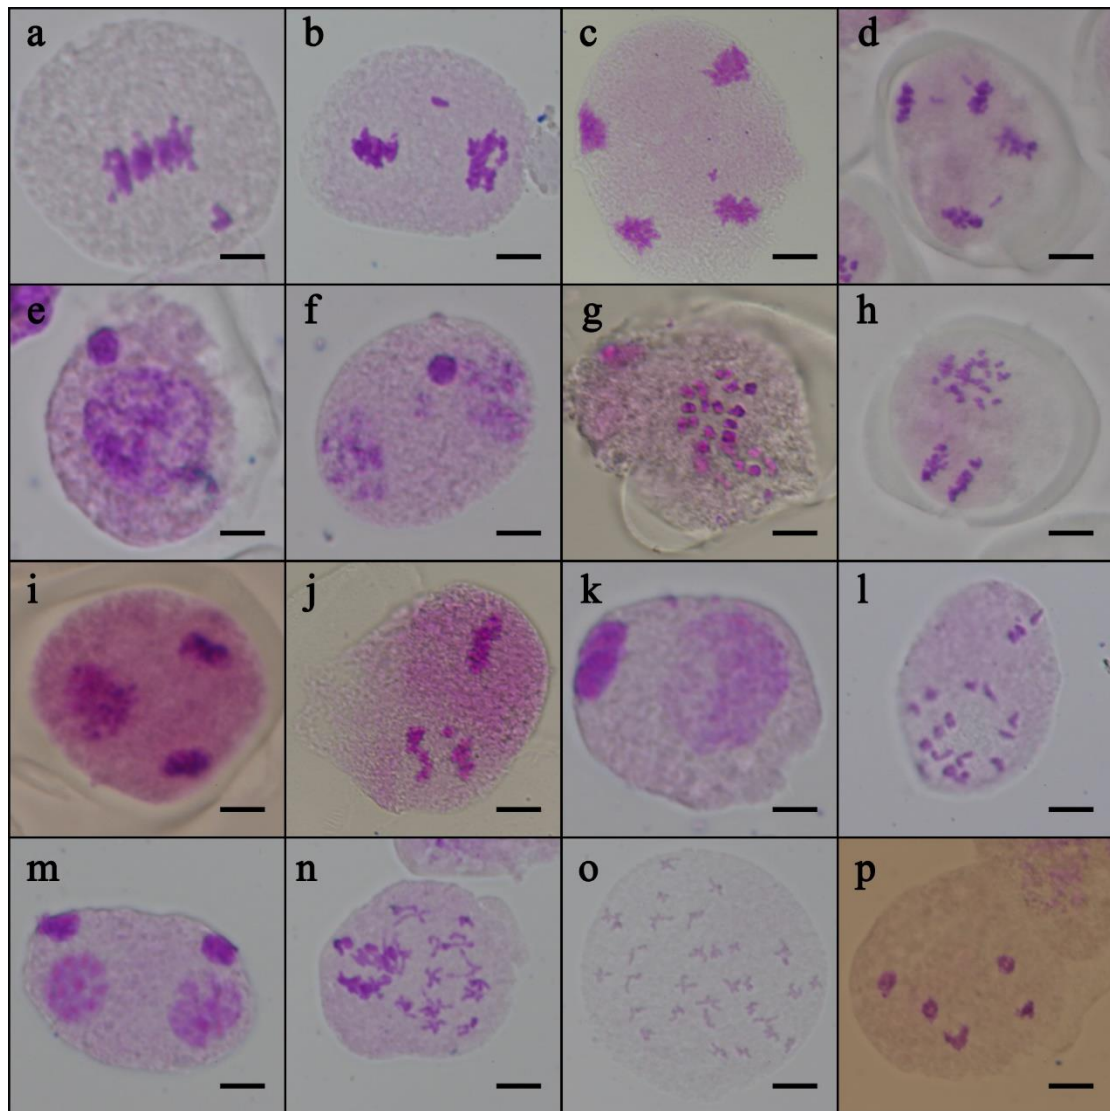

140

141 Fig. 3 Other abnormalities in meiosis of 'Fudingdabai' PMCs

142 (a) Chromosomes were not synchronized in metaphase I, (b-d) Lagging chromosomes, (e-f) Micronuclei, (g)  
143 Univalent chromosome, (h-j) Chromosomes on either side of the cell are at two different stages of  
144 division, (k-n) Abnormal karyokinesis and cytokinesis, (o) Increase of chromosomes, (p)  
145 Decrease of chromosomes. Bar=10µm

146

147

## Discussion

148 The present study observed male meiosis and microsporogenesis from 'Fudingdabai' of

149 *C.sinensis* in the Shandong Province of China. The results showed that meiotic abnormalities,

150 including cytotoxicity, lagging chromosomes, micronuclei, and chromosome separation, were not

151 synchronized and appeared in about 5.44% of PMCs, and abnormal cytokinesis (Table 1,  
152 Figures 2, 3). Abnormal meiotic processes often result in disruption of microsporogenesis,  
153 leading to pollen aberrations or sterility and negatively impacting the reproductive success of  
154 the species<sup>[9-12]</sup>.

155 Cytomixis is one phenomenon that is under the influence of genetic and environmental  
156 factors<sup>[13]</sup>. After it was first recorded by Arnoldi (1900), the phenomenon of cytomixis and  
157 other abnormalities responsible for abnormal meiotic behavior and reduced pollen fertility have  
158 been reported in some flowering plants<sup>[9,12,14-16]</sup>. However, the term ‘cytomixis’ was coined by  
159 Gates (1911), who studied the PMCs of *Oenothera gigas* and defined it as a phenomenon of  
160 transmigration of chromatin from one cell to an adjacent cell. Cytomixis involves the migration  
161 of chromatin material among meiocytes through cytomictic connections<sup>[17]</sup>. This  
162 phenomenon is most frequently observed in male meiosis and has been so far  
163 described in the microsporogenesis of over 400 higher plant species<sup>[18,19]</sup>. In many  
164 of the earlier studies, cytomixis had been held directly responsible for inducing abnormal  
165 meiotic behavior, pollen sterility, and pollen grains of variable sizes<sup>[20,21]</sup>.

166 Many authors have suggested cytomixis as an artifact of fixation<sup>[22,23]</sup>. To reduce the effect  
167 of fixative on cytomixis, freshly collected anthers were stained immediately for observation  
168 without fixation, yet there appeared to be no difference in the incidence and frequency of  
169 cytomixis between fresh and fixed anthers. This result dramatically excludes fixation as a factor  
170 inducing cytomixis in the present study. Many authors previously reported this finding<sup>[21,24]</sup>.

171 Cytomixis has been reported to be observed only at the early stages of the first meiotic  
172 division in many plants<sup>[11]</sup>, whereas in *Camellia sinensis* cell fusion was observed at every stage,

173 even at the telophase II . In most cases, the nucleus does not pass to the recipient cell as a whole.  
174 Once the CC is passed, parts of the nucleus bud off to form one or several micronuclei in the  
175 recipient cell cytoplasm, whereas the more significant part of the migrating nucleus remains in  
176 the donor cell. When a whole nucleus migrates to the recipient cell to form, a binucleated  
177 meiocyte is rarer<sup>[25,26]</sup>.

178 Aberrant chromosome behavior other than cytomixis was also observed, but the frequency  
179 was much lower than cytomixis. The number of meiotic abnormalities, such as univalents,  
180 bridges, fragments, unequal separation, and lagging chromosomes, was recorded and analyzed  
181 at different stages. Due to cytomixis, a change in the amount of chromatin or the number of  
182 chromosomes in the cells is involved. Depending on the nature of cytomixis, cells with the  
183 aneuploid number of chromosomes are formed probably through cytoplasmic connection type.  
184 Micronucleus formation was caused by chromosome lag that prevented chromosomes from  
185 entering newly formed cells<sup>[27]</sup>. The formation of lagging chromosomes is a product of several  
186 pre-anaphasic chromosomal irregularities<sup>[28]</sup>. However, the detailed mechanisms underlying  
187 these observations in *C. sinensis* are unclear.

188 In conclusion, we observed a high frequency of aberrant phenomena in the meiosis of  
189 ‘Fudingdabai’, with the highest frequency of cell fusion occurring at almost every period,  
190 unlike in other plants where it was reported to occur only in the meiosis I . Other anomalies  
191 occurred much less frequently than cell fusion. However, more work is needed to elucidate the  
192 true causes, consequences and significance of the occurrence of meiotic anomalies such as cell  
193 fusion in tea trees.

194

Table 1 Statistics of meiosis behavior of PMCs of 'Fudingdabai'

| stage      | Total<br>number<br>of cells | Abnormal  |           |           |           |                         |           |                        |           |              |           |                            |           |           |           |                  |           |       |
|------------|-----------------------------|-----------|-----------|-----------|-----------|-------------------------|-----------|------------------------|-----------|--------------|-----------|----------------------------|-----------|-----------|-----------|------------------|-----------|-------|
|            |                             | Normal    |           | Cytomixis |           | Meiotic<br>asynchronous |           | Laggard<br>chromosomes |           | micronucleus |           | Numerical<br>abnormalities |           | Univalent |           | Unequal division |           |       |
|            |                             | number    | frequency | number    | frequency | number                  | frequency | number                 | frequency | number       | frequency | number                     | frequency | number    | frequency | number           | frequency |       |
| Meiosis I  | Leptotene                   | 1187      | 1182      | 99.58%    | 4         | 0.34%                   |           |                        |           |              | 1         | 0.08%                      |           |           |           |                  |           |       |
|            | Prophase I                  | Prophase  | 1381      | 1324      | 95.87%    | 50                      | 3.62%     |                        |           |              |           | 6                          | 0.43%     |           |           |                  | 1         | 0.07% |
|            |                             | Pachytene | 147       | 146       | 99.32%    |                         |           |                        |           |              |           |                            |           |           |           |                  | 1         | 0.68% |
|            |                             | Diplotene | 176       | 167       | 94.89%    | 6                       | 3.41%     |                        |           |              |           |                            |           | 3         | 1.70%     |                  |           |       |
|            | Diakinesis                  | 439       | 407       | 92.17%    | 12        | 2.73%                   |           |                        |           |              |           |                            | 16        | 3.64%     | 4         | 0.91%            |           |       |
|            | Metaphase I                 | 657       | 613       | 93.30%    | 27        | 4.11%                   |           |                        | 8         | 1.22%        |           |                            |           |           | 9         | 1.37%            |           |       |
|            | Anaphase I                  | 67        | 65        | 97.01%    |           |                         |           |                        | 2         | 2.99%        |           |                            |           |           |           |                  |           |       |
|            | Telophase I                 | 206       | 202       | 98.06%    |           |                         |           |                        | 4         | 1.94%        |           |                            |           |           |           |                  |           |       |
| Meiosis II | Prophase II                 | 538       | 478       | 88.85%    | 13        | 2.42%                   | 14        | 2.60%                  | 2         | 0.37%        | 9         | 1.67%                      |           |           |           |                  | 22        | 4.09% |
|            | Metaphase II                | 399       | 338       | 84.71%    | 37        | 9.27%                   | 13        | 3.26%                  | 4         | 1.00%        | 5         | 1.25%                      |           |           | 2         | 0.50%            |           |       |
|            | Anaphase II                 | 394       | 356       | 90.36%    | 14        | 3.55%                   | 6         | 1.52%                  | 5         | 1.27%        | 2         | 0.51%                      | 9         | 2.28%     | 2         | 0.51%            |           |       |
|            | Tetrahedral II              | 1581      | 1481      | 93.67%    | 78        | 4.93%                   |           |                        |           |              | 2         | 0.13%                      | 15        | 0.95%     |           |                  | 5         | 0.32% |
|            | Tetrad                      | 415       | 415       | 100%      |           |                         |           |                        |           |              |           |                            |           |           |           |                  |           |       |
| Total      | 7587                        | 7174      | 94.56%    | 241       | 3.18%     | 33                      | 0.43%     | 25                     | 0.33%     | 25           | 0.33%     | 43                         | 0.57%     | 17        | 0.22%     | 29               | 0.38%     |       |

197

## **8. Conflict of interest**

198

The authors declare that they have no conflict of interest

199

## Reference

200

1. Brody H. 2019. Tea. *Nature*, 566(7742), S1–S1.

201

2. Wei, CL, Yang H, Wang SB, Zhao J, Liu C, et al. 2018. Draft genome sequence of

202

*Camellia sinensis* var. *sinensis* provides insights into the evolution of the tea genome and tea

203

quality. *Proceedings of the National Academy of Sciences*: 115(18).

204

3. Wang X, Wang L, Hao X, Zeng J, Yang Y. 2019. 40 years of tea genetic breeding in

205

China. *China Tea*. 41(5):1–6.

206

4. Qiao, D, Yang, C, Guo, Y. 2023. The complete chloroplast genome sequence of

207

*Camellia sinensis* var. *Sinensis* cultivar ‘FuDingDaBaiCha.’ *Mitochondrial DNA Part B*, 8(1),

208

100–104.

209

5. Kato M, Shimura T. 1970 Cytogenetical studies on *Camellia* species: I. the meiosis

210

and gametogenesis of *Camellia wabiske* compared with *C. japonica* and *C. sinensis*. *Japan J*

211

*Breed* 20(4): 200–210

212

6. Jiang HB, Yang SM, Liu YF, Tian YP, Sun YN, et al. 2020. Biological characteristics

213

and cytological studies on anther abortion of male sterile *Camellia crassocolumna*. *Acta*

214

*Agronomica Sinica*, 46(7), 1076–1086.

215

7. Li L, Hu YF, He M, Zhang B, Wu W, et al. 2021. Comparative chloroplast genomes:

216

Insights into the evolution of the chloroplast genome of *Camellia sinensis* and the phylogeny

217

of *Camellia*. *BMC Genomics* 22: 138.

218

8. Zhang X, Tong H, Han Z, Huang L, Tian J, et al. 2021. Cytological and morphology

219

characteristics of natural microsporogenesis within *Camellia oleifera*. *Physiology and*

220

*Molecular Biology of Plants*, 27(5), 959–968.



- 221           9. Kumar P, Singhal VK. 2008. Cytology of *Caltha palustris* L. (Ranunculaceae) from  
222 cold regions of Western Himalayas. *Cytologia* 73: 137–143.
- 223           10. Lattoo SK, Khan S, Bamotra S, Dhar AK. 2006. Cytomixis impairs meiosis and  
224 influences reproductive success in *Chlorophytum comosum* (Thunb) Jacq. —an additional  
225 strategy and possible implications. *Journal of Biosciences* 31: 629–637.
- 226           11. Singh H, Singh J, Kumar P, Singhal, VK, Kholia B S, et al. 2020. Chromosome count,  
227 male meiotic behaviour and pollen fertility analysis in *Agropyron thomsonii* Hook.f. and *Elymus*  
228 *nutans* Griseb. (Triticeae: Poaceae) from Western Himalaya, India. *Caryologia* 73: 89–98.
- 229           12. Singhal VK, Kumar P. 2008. Impact of cytomixis on meiosis, pollen viability and  
230 pollen size in wild populations of *Himalayan poppy* (*Meconopsis aculeata* Royle). *Journal of*  
231 *Biosciences* 33: 371–380.
- 232           13. Rana P, Kumar P, Singhal, V. 2013. Spindle irregularities, chromatin transfer, and  
233 chromatin stickiness during male meiosis in *Anemone tetrasepala* (Ranunculaceae). *Turkish*  
234 *Journal of Botany* 37: 167–176.
- 235           14. Rana PK, Kumar P, Singhal VK. 2014. Cytomixis and Associated Abnormalities  
236 during Male Meiosis in *Lindelofia longiflora* var. *Falconeri* (Boraginaceae). *Cytologia* 79: 535–  
237 540.
- 238           15. Liu Y, Hui RK., Deng RN, Wang JJ, Wang M, et al. 2012. Abnormal male meiosis  
239 explains pollen sterility in the polyploid medicinal plant *Pinellia ternata* (Araceae). *Genetics*  
240 *and Molecular Research* 11: 112–120.
- 241           16. Malallah GA, Attia TA. 2003. Cytomixis and its possible evolutionary role in a  
242 Kuwaiti population of *Diplotaxis harra* (Brassicaceae). *Botanical Journal of the Linnean*

243 *Society* 143: 169–175.

244 17. Rani S, Chahota RK, Sharma TR. 2016. Cytomixis and Associated Meiotic  
245 Abnormalities during Male Meiosis in *Angelica glauca* Edgew. (Apiaceae) from North-Western  
246 Himalayas. *Cytologia* 81: 161–168.

247 18. Gupta H, Gupta RC, Kumar R, Singhal VK. 2017. A profile of chromosome counts,  
248 male meiosis and pollen fertility in 45 species of Asteraceae from Parvati Valley in Kullu district,  
249 Himachal Pradesh. *Caryologia*, 70: 128–140.

250 19. Mursalimov SR, Sidorchuk YV, Deineko EV. 2013. New insights into cytomixis:  
251 Specific cellular features and prevalence in higher plants. *Planta* 238: 415–423.

252 20. Guan JZ, Wang JJ, Cheng ZH, Liu Y, Li ZY. 2012. Cytomixis and meiotic  
253 abnormalities during microsporogenesis are responsible for male sterility and chromosome  
254 variations in *Houttuynia cordata*. *Genetics and Molecular Research* 11: 121–130.

255 21. Haroun SA, Al Shehri AM, Al Wadie HM. 2004. Cytomixis in the Microsporogenesis  
256 of *Vicia faba* L. (Fabaceae). *Cytologia* 69: 7–11.

257 22. Haroun SA. 1995. Cytomixis in Pollen Mother Cells of *Polygonum tomentosum*  
258 Schrank. *Cytologia* 60: 257–260.

259 23. Kundu AK, Sharma AK. 1988. Cytomixis in *Lamiaceae*. *Cytologia*, 53: 469–474.

260 24. Li XF, Song ZQ, Feng DS, Wang HG. 2009. Cytomixis in *Thinopyrum intermedium*,  
261 *Thinopyrum ponticum* and its Hybrids with Wheat. *Cereal Research Communications* 37: 353-  
262 361

263 25. Mursalimov SR, Deineko EV. 2015. How cytomixis can form unreduced gametes in  
264 tobacco. *Plant Systematics and Evolution* 301: 1293–1297.

- 265           26. Sidorchuk YV, Deineko EV, Shumny VK. 2007. Peculiarities of cytomixis in pollen  
266 mother cells of transgenic tobacco plants (*Nicotiana tabacum* L.) with mutant phenotype. *Cell*  
267 *and Tissue Biology* 1: 570–576.
- 268           27. Li XT, Huang F, Chai J, Wang QS, Yu F et al. 2021. Chromosome behavior during  
269 meiosis in pollen mother cells from *Saccharum officinarum* × *Erianthus arundinaceus* F1  
270 hybrids. *BMC Plant Biology*, 21: 139.
- 271           28. Alam Q, Khah MA, Azad ZR. 2022. Comparative Analysis of Different Chemical  
272 Mutagens in Inducing Chromosomal Aberrations in Meiotic Cells of *Triticum aestivum* L.  
273 *Cytologia* 87: 99–105.
